# Supplementary material for: Particle Swarm Optimization for Surface complexation with the PHREEQC geochemical model
Source: Copernicus journal article supplement (doi:10.5194/gmd-2017-38), 2017-07-17
Supplement: Supplementary file [file gmd-2017-38-AC4-supplement.pdf]

**Answer Editor comments:**

Editor: In particular, please note that for your paper, the following requirements have not been met in the Discussions paper:

- "The main paper must give the model name and version number (or other unique identifier) in the title."

Therefore please provide a version number of PHREEQC in the title of your article in your revised submission to GMD

Response: The PHREEQC version was added.
